# Supplementary material
Source: MDPI journal article supplement (https://www.mdpi.com/2673-6373/1/2/13)
Supplement: s1 [file s1 › oral-1188675-supplementary.pdf]

**Supplementary material** - A cross-sectional study of bitter-taste receptor genotypes, oral health and markers of oral inflammation

Kiranjit Kaur <sup>1</sup>, Alexandria Turner <sup>1</sup>, Patrice Jones <sup>1</sup>, Dean Sculley <sup>2</sup>, Martin Veysey <sup>3</sup>, Mark Lucock <sup>1</sup>, Janet Wallace <sup>4,5</sup> and Emma L Beckett <sup>1,6,7,\*</sup>

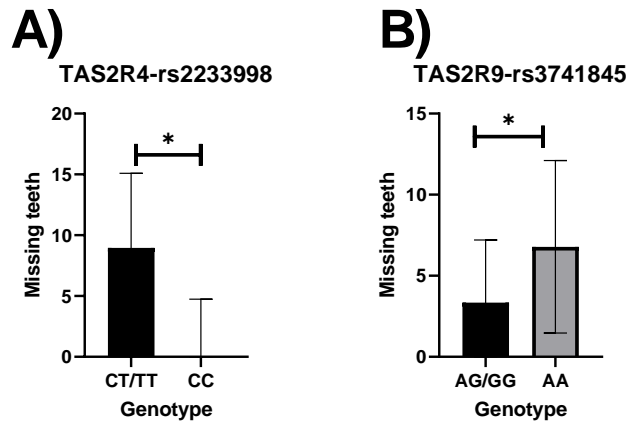

**Figure S1.** Relationship between bitter taste genotypes and missing teeth, Least-square adjusted means for (A) age, sex, income, education, and smoking status (B) Age, sex, income, education, smoking status and the dietary index; Significant p-values are represented as asterisks \* $\leq 0.05$ , \*\* $\leq 0.01$ , \*\*\* $\leq 0.001$ , \*\*\*\*  $\leq 0.0001$  and ns-non-significant; Error bars mark 95% confidence intervals.

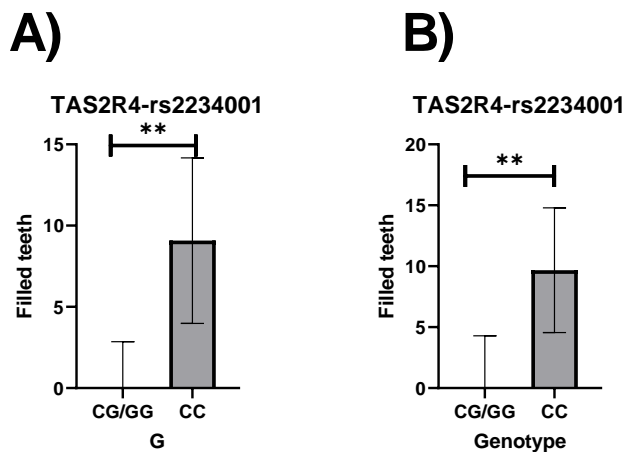

**Figure S2.** Relationship between bitter taste genotypes and Filled teeth, Least-square adjusted means for (A) age, sex, income, education, and smoking status (B) age, sex, income, education, smoking status and the dietary index; Significant p-values are represented as asterisks \*\* $\leq 0.01$ , Error bars mark 95% confidence intervals.

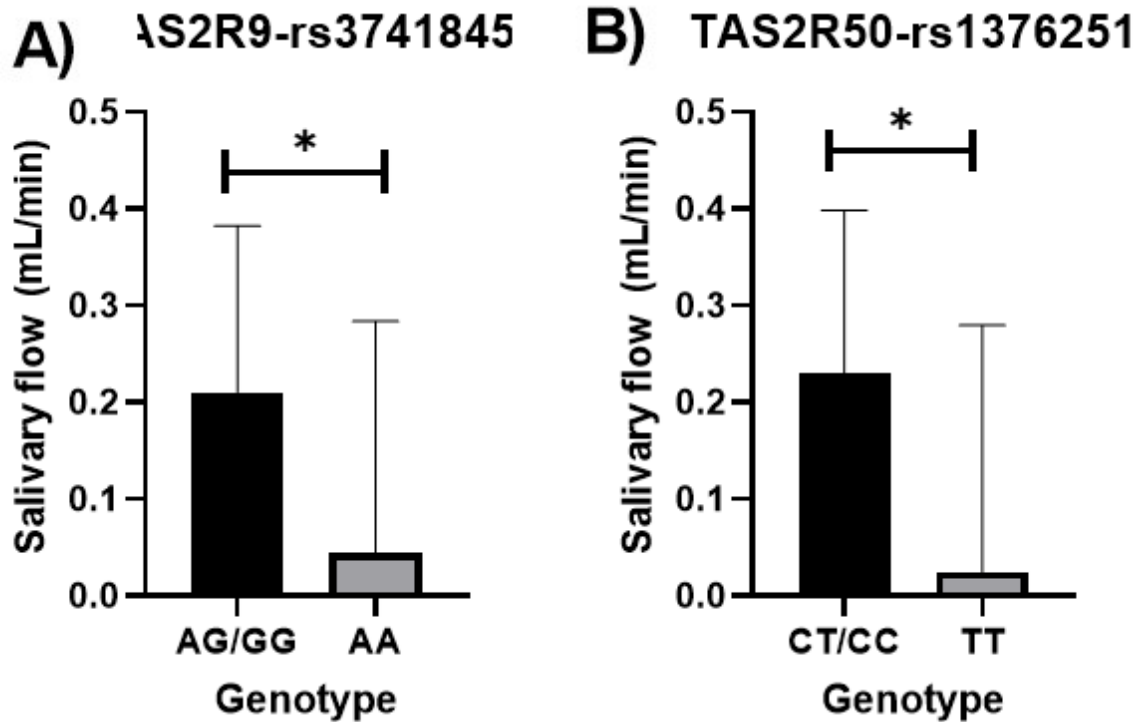

**Figure S3.** Relationship between bitter taste genotypes and salivary flow rate (mL/min), Least-square adjusted means (age, sex, income, education, and smoking status); (A) *TAS2R9*-rs3741845 (B) *TAS2R50*-rs1376251 Significant p-values are represented as asterisks \* $\leq 0.05$ , \*\* $\leq 0.01$ , \*\*\* $\leq 0.001$ , \*\*\*\* $\leq 0.0001$  and ns-non-significant; Error bars mark 95% confidence intervals.

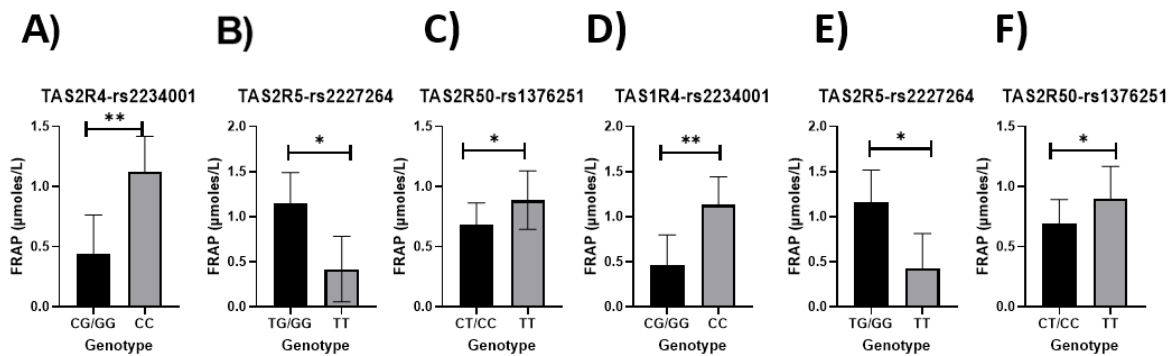

**Figure S4.** Relationship between bitter taste genotypes and FRAP (μmoles/L), Least-square adjusted means (age, sex, income, education, and smoking status) (A) *TAS2R4*-rs2234001, (B) *TAS2R5*-rs2227264, (C) *TAS2R50*-rs1376251. Least-square adjusted means (age, sex, income, education, smoking status and the dietary index) (D) *TAS2R4*-rs2234001, (E) *TAS2R5*-rs2227264, (F) *TAS2R50*-rs1376251. Significant p-values are represented as asterisks \* $\leq 0.05$ , \*\* $\leq 0.01$ ; Error bars mark 95% confidence intervals.

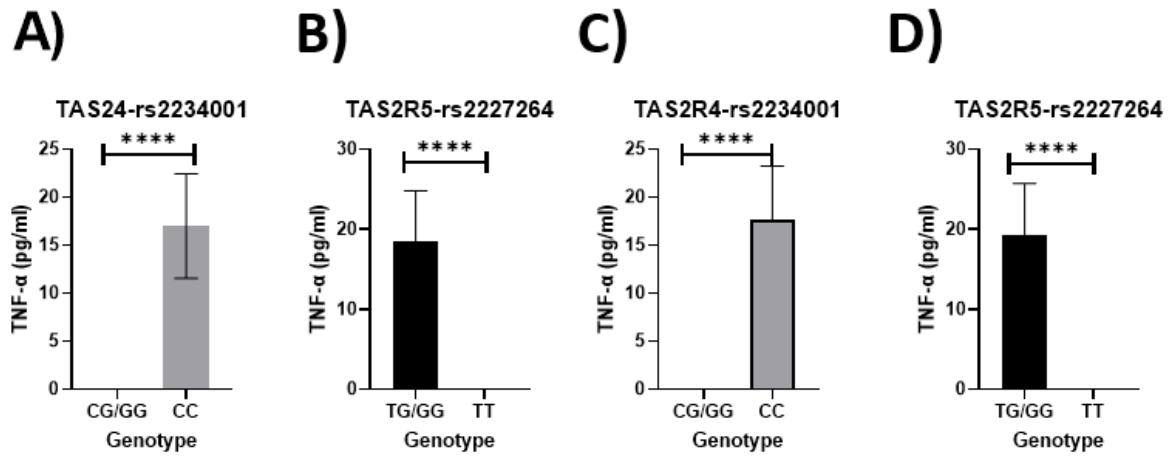

**Figure S5.** Relationship between bitter taste genotypes and TNF- $\alpha$  (pg/ml), Least-square adjusted means (age, sex, income, education, and smoking status) **(A)** *TAS2R4*-rs2234001, **(B)** *TAS2R5*-rs2227264. Least-square adjusted means (age, sex, income, education, smoking status and the dietary index) **(C)** *TAS2R4*-rs2234001, **(D)** *TAS2R5*-rs2227264; Significant p-values are represented as asterisks \*\*\*\*  $\leq 0.0001$ ; Error bars mark 95% confidence intervals.
